# Supplementary figures and images for: High-energy-density dielectric films based on polyvinylidene fluoride and aromatic polythiourea for capacitors
Source: Royal Society of Chemistry journal article supplement (doi:10.1039/c4ta03374d), 2014-07-30

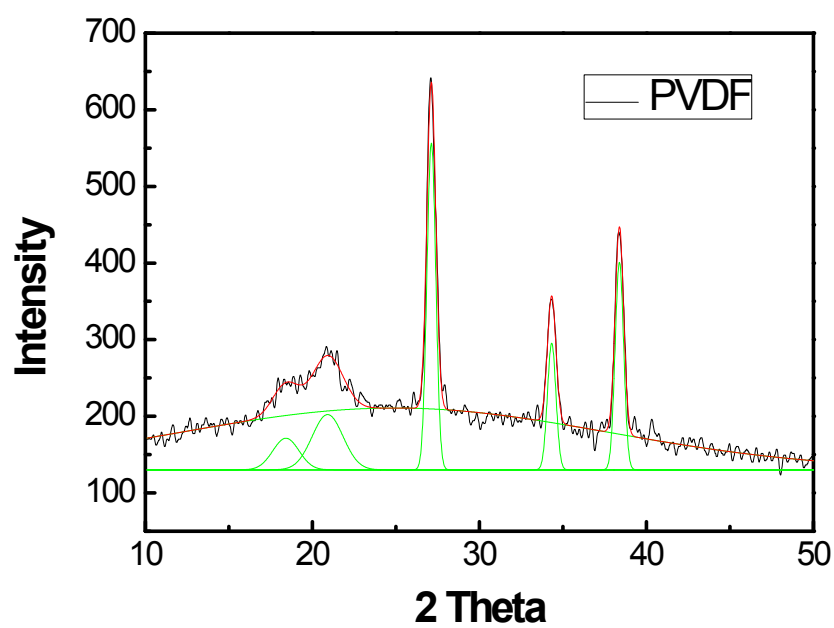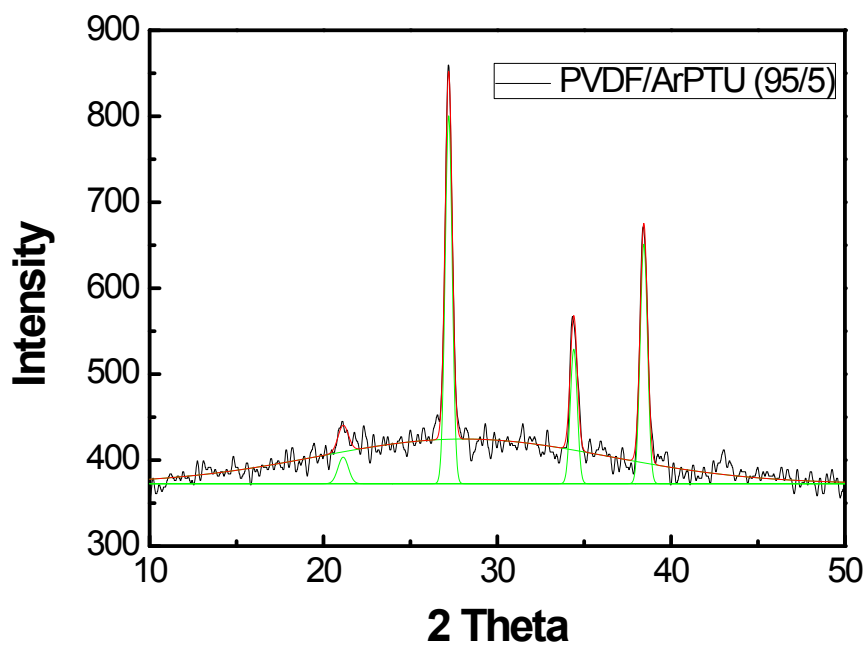

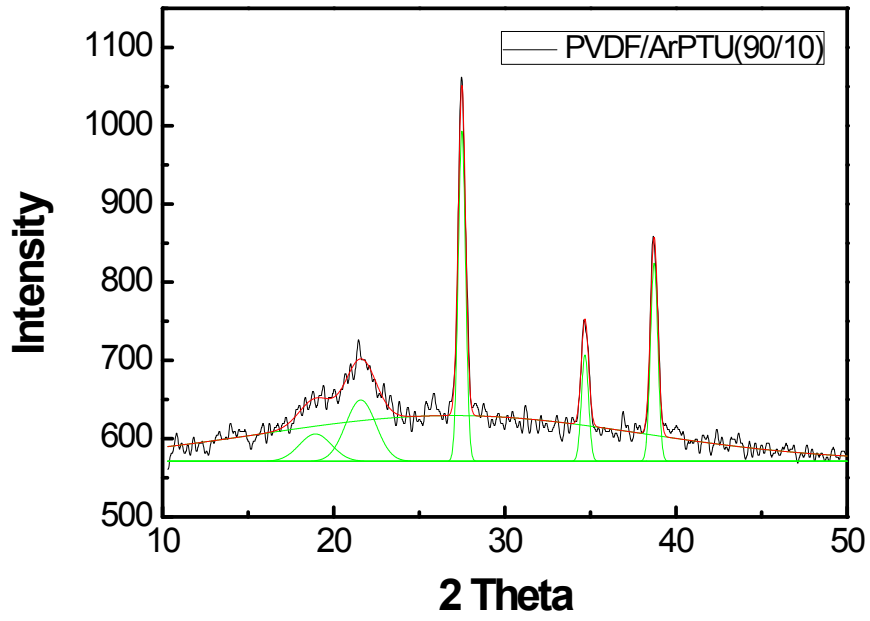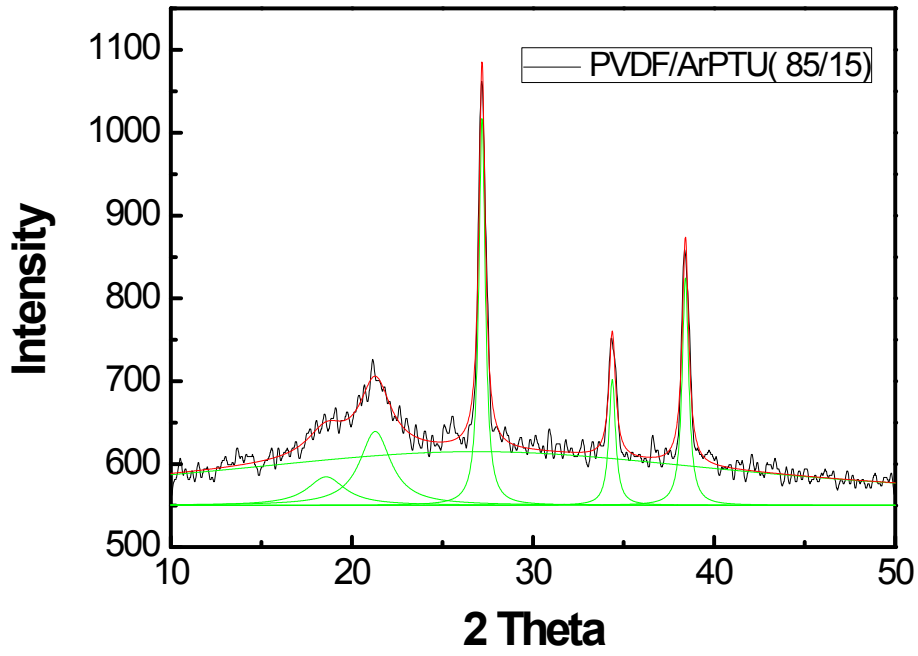

Supplement: c4ta03374d1.pdf [file c4ta03374d1.pdf]
